# Supplementary material for: Effect of lithium salt on fluorescence quenching in glycerol: a comparison with ionic liquid/deep eutectic solvent
Source: Royal Society of Chemistry journal article supplement (doi:10.1039/d1cp03678e), 2021-11-26
Supplement: d1cp03678e1.pdf [file d1cp03678e1.pdf]

## **Electronic Supplementary Information (ESI)**

### **Effect of lithium salt on fluorescence quenching in glycerol: a comparison with ionic liquid/deep eutectic solvent**

Siddharth Pandey,\* Ankit Yadav, Manish Kumar, Anjali and Divya Dhingra

Department of Chemistry, Indian Institute of Technology Delhi, Hauz Khas, New Delhi –  
110016, India.

\*To whom correspondence should be addressed.

E-mail: sipandey@chemistry.iitd.ac.in, Phone: +91-11-26596503, Fax: +91-11-26581102

## Table of Contents

|          | <b>Page No.</b> |
|----------|-----------------|
| Table S1 | S3              |
| Table S2 | S4              |
| Table S3 | S4              |
| Table S4 | S5              |
| Table S5 | S6              |
| Fig. S1  | S12             |

Table S1: Quantitative comparison of parameters obtained from regression analysis of density ( $\rho$ ) vs T (K) plots for different Li-salt added systems, i.e. LiCl-added 1 wt% water in glycerol ( $m_{LiCl} = 0.0 - 3.0 \text{ mol.kg}^{-1}$ ), LiCl-added ChCl:Urea ( $m_{LiCl} = 0.000 - 2.093 \text{ mol.kg}^{-1}$ ) and LiTf<sub>2</sub>N added [emim][Tf<sub>2</sub>N] ( $x_{LiTf2N} = 0.00 - 0.40$ ) within the investigated range, 298.15 – 358.15 K. Standard deviations are given as  $\pm$  in parenthesis.

| 1 wt% water in glycerol               |                                   |                                                | ChCl:Urea                             |                                   |                                                | [emim][Tf <sub>2</sub> N] |                                   |                                                |
|---------------------------------------|-----------------------------------|------------------------------------------------|---------------------------------------|-----------------------------------|------------------------------------------------|---------------------------|-----------------------------------|------------------------------------------------|
| $m_{LiCl}$<br>(mol.kg <sup>-1</sup> ) | $\rho_o$<br>(g.cm <sup>-3</sup> ) | (-) $a$ (K <sup>-1</sup> )<br>$\times 10^{-4}$ | $m_{LiCl}$<br>(mol.kg <sup>-1</sup> ) | $\rho_o$<br>(g.cm <sup>-3</sup> ) | (-) $a$ (K <sup>-1</sup> )<br>$\times 10^{-4}$ | $x_{LiTf2N}$              | $\rho_o$<br>(g.cm <sup>-3</sup> ) | (-) $a$ (K <sup>-1</sup> )<br>$\times 10^{-4}$ |
| 0.0                                   | 1.46( $\pm 0.00_5$ )              | 6.78( $\pm 0.16$ )                             | 0.000                                 | 1.38( $\pm 0.00_1$ )              | 6.22( $\pm 0.21$ )                             | 0.00                      | 1.79( $\pm 0.01$ )                | 9.20( $\pm 0.20$ )                             |
| 0.5                                   | 1.47( $\pm 0.00_6$ )              | 6.74( $\pm 0.19$ )                             | 0.419                                 | 1.40( $\pm 0.00_1$ )              | 6.40( $\pm 0.20$ )                             | 0.05                      | 1.78( $\pm 0.01$ )                | 8.40( $\pm 0.33$ )                             |
| 1.0                                   | 1.48( $\pm 0.00_7$ )              | 6.69( $\pm 0.22$ )                             | 0.832                                 | 1.40( $\pm 0.00_1$ )              | 6.21( $\pm 0.27$ )                             | 0.10                      | 1.79( $\pm 0.01$ )                | 8.40( $\pm 0.33$ )                             |
| 1.5                                   | 1.48( $\pm 0.00_8$ )              | 6.64( $\pm 0.25$ )                             | 1.256                                 | 1.40( $\pm 0.00_1$ )              | 6.17( $\pm 0.29$ )                             | 0.20                      | 1.83( $\pm 0.01$ )                | 8.60( $\pm 0.32$ )                             |
| 2.0                                   | 1.49( $\pm 0.00_9$ )              | 6.60( $\pm 0.27$ )                             | 1.675                                 | 1.41( $\pm 0.00_1$ )              | 6.17( $\pm 0.31$ )                             | 0.30                      | 1.87( $\pm 0.01$ )                | 8.87( $\pm 0.00_1$ )                           |
| 2.5                                   | 1.50( $\pm 0.00_9$ )              | 6.56( $\pm 0.30$ )                             | 2.093                                 | 1.42( $\pm 0.00_1$ )              | 6.10( $\pm 0.33$ )                             | 0.40                      | 1.91( $\pm 0.01$ )                | 9.07( $\pm 0.33$ )                             |
| 3.0                                   | 1.50( $\pm 0.01$ )                | 6.53( $\pm 0.32$ )                             | -                                     | -                                 | -                                              | -                         | -                                 | -                                              |

Table S2: Quantitative comparison of parameters obtained from regression analysis of density ( $\rho$ ) vs  $m_{LiCl}$  (mol.kg<sup>-1</sup>) plots for LiCl added-1 wt% water in glycerol and LiCl added ChCl:Urea systems. Regression analysis shows the data is best fit according to the equation:  $\rho = \rho_o + bm_{LiCl}$ . Standard deviations are given as  $\pm$  in parenthesis.

| T (K)  | 1 wt% water in glycerol        |                                                                                  | ChCl:Urea <sup>19</sup>        |                                                                                  |
|--------|--------------------------------|----------------------------------------------------------------------------------|--------------------------------|----------------------------------------------------------------------------------|
|        | $\rho_o$ (g.cm <sup>-3</sup> ) | <b>b</b> (g <sup>2</sup> .cm <sup>-3</sup> .mol <sup>-1</sup> )<br>$\times 10^3$ | $\rho_o$ (g.cm <sup>-3</sup> ) | <b>b</b> (g <sup>2</sup> .cm <sup>-3</sup> .mol <sup>-1</sup> )<br>$\times 10^3$ |
| 298.15 | 1.26( $\pm 0.00_1$ )           | 16.70( $\pm 0.00_1$ )                                                            | 1.19( $\pm 0.00_1$ )           | 18.20( $\pm 0.00_2$ )                                                            |
| 313.15 | 1.25( $\pm 0.00_1$ )           | 17.20( $\pm 0.00_1$ )                                                            | 1.18( $\pm 0.00_1$ )           | 18.20( $\pm 0.00_2$ )                                                            |
| 328.15 | 1.24( $\pm 0.00_1$ )           | 17.50( $\pm 0.00_1$ )                                                            | 1.18( $\pm 0.00_1$ )           | 19.00( $\pm 0.00_2$ )                                                            |
| 343.15 | 1.23( $\pm 0.00_1$ )           | 17.40( $\pm 0.00_1$ )                                                            | 1.17( $\pm 0.00_1$ )           | 18.90( $\pm 0.00_2$ )                                                            |
| 358.15 | 1.22( $\pm 0.00_1$ )           | 17.20( $\pm 0.00_1$ )                                                            | 1.16( $\pm 0.00_1$ )           | 18.90( $\pm 0.00_2$ )                                                            |

Table S3: Parameters obtained from regression analysis of density ( $\rho$ ) vs  $m_{LiCl}$  plots for LiTf<sub>2</sub>N added-[emim][Tf<sub>2</sub>N]. Regression analysis shows the data is best fit according to the equation:  $\rho = \rho_o + bx_{LiTf_2N} + cx_{LiTf_2N}^2$ . Standard deviations are given as  $\pm$  in parenthesis.

| T (K)  | [emim][Tf <sub>2</sub> N] <sup>20</sup> |                                |                                |
|--------|-----------------------------------------|--------------------------------|--------------------------------|
|        | $\rho_o$ (g.cm <sup>-3</sup> )          | <b>b</b> (g.cm <sup>-3</sup> ) | <b>c</b> (g.cm <sup>-3</sup> ) |
| 298.15 | 1.52( $\pm 0.00_1$ )                    | 0.26( $\pm 0.01$ )             | 0.15( $\pm 0.02$ )             |
| 313.15 | 1.50( $\pm 0.00_1$ )                    | 0.26( $\pm 0.01$ )             | 0.14( $\pm 0.02$ )             |
| 328.15 | 1.49( $\pm 0.00_1$ )                    | 0.27( $\pm 0.01$ )             | 0.10( $\pm 0.03$ )             |
| 343.15 | 1.47( $\pm 0.00_1$ )                    | 0.28( $\pm 0.02$ )             | 0.08( $\pm 0.04$ )             |
| 358.15 | 1.46( $\pm 0.00_1$ )                    | 0.28( $\pm 0.02$ )             | 0.08( $\pm 0.04$ )             |

Table S4: Recovered excited-state intensity decay parameters for double-exponential decay of pyrene (10  $\mu\text{M}$ ; excitation wavelength at 340 nm using nano LED source; emission wavelength collected at 373 nm) dissolved in the investigated system comprising of 1 wt% water in glycerol solution at varying concentration of LiCl in the temperature range 298.15 – 358.15 K. Error associated with decay times is  $\leq \pm 5\%$ . Decay times ( $\tau$ ) are in nanosecond (ns) and  $\alpha$  are in %.

| T (K)                      | $m_{\text{LiCl}}$<br>(mol.kg <sup>-1</sup> ) | 0.0                        | 0.5                        | 1.0             | 1.5             | 2.0             | 2.5             | 3.0             |
|----------------------------|----------------------------------------------|----------------------------|----------------------------|-----------------|-----------------|-----------------|-----------------|-----------------|
|                            |                                              | 298.15                     | $\tau_1$<br>( $\alpha_1$ ) | 1.7<br>(0.1)    | 1.1<br>(0.1)    | 1.3<br>(0.1)    | 95.3<br>(0.1)   | 1.6<br>(0.1)    |
| $\tau_2$<br>( $\alpha_2$ ) | 241.9<br>(99.9)                              |                            | 241.1<br>(99.9)            | 239.3<br>(99.9) | 234.3<br>(99.9) | 228.3<br>(99.9) | 226.3<br>(99.9) | 220.6<br>(99.9) |
| $\chi^2$                   | 1.10                                         |                            | 1.12                       | 1.10            | 1.11            | 1.14            | 1.13            | 1.10            |
| 313.15                     | $\tau_1$<br>( $\alpha_1$ )                   |                            | 204.9<br>(1.6)             | 91.9<br>(0.2)   | 0.7<br>(0.6)    | 0.5<br>(0.6)    | 0.7<br>(0.5)    | 0.5<br>(3.2)    |
|                            | $\tau_2$<br>( $\alpha_2$ )                   | 235.7<br>(98.4)            | 233.7<br>(99.8)            | 222.6<br>(99.4) | 217.4<br>(99.4) | 213.7<br>(99.5) | 206.9<br>(96.8) | 206.8<br>(99.5) |
|                            | $\chi^2$                                     | 1.02                       | 1.10                       | 1.03            | 1.07            | 1.09            | 1.10            | 1.05            |
|                            | 328.15                                       | $\tau_1$<br>( $\alpha_1$ ) | 1.9<br>(0.1)               | 1.9<br>(0.1)    | 1.3<br>(0.1)    | 1.6<br>(0.1)    | 1.0<br>(0.1)    | 1.0<br>(0.1)    |
| $\tau_2$<br>( $\alpha_2$ ) |                                              | 216.9<br>(99.9)            | 210.2<br>(99.9)            | 205.0<br>(99.9) | 202.7<br>(99.9) | 199.1<br>(99.9) | 194.7<br>(99.9) | 192.7<br>(99.9) |
| $\chi^2$                   |                                              | 1.06                       | 1.04                       | 1.10            | 1.07            | 1.03            | 1.08            | 1.02            |
| 343.15                     |                                              | $\tau_1$<br>( $\alpha_1$ ) | 1.7<br>(0.5)               | 1.4<br>(0.7)    | 1.6<br>(0.1)    | 1.6<br>(0.1)    | 1.0<br>(0.5)    | 0.6<br>(1.0)    |
|                            | $\tau_2$<br>( $\alpha_2$ )                   | 201.9<br>(99.5)            | 195.2<br>(99.3)            | 195.1<br>(99.9) | 194.1<br>(99.9) | 186.9<br>(99.5) | 185.8<br>(99.0) | 180.6<br>(99.4) |
|                            | $\chi^2$                                     | 1.04                       | 1.07                       | 1.08            | 1.08            | 1.05            | 1.09            | 1.07            |
|                            | 358.15                                       | $\tau_1$<br>( $\alpha_1$ ) | 2.1<br>(0.5)               | 83.7<br>(3.8)   | 1.6<br>(0.5)    | 80.6<br>(2.9)   | 0.8<br>(0.4)    | 1.2<br>(0.6)    |
| $\tau_2$<br>( $\alpha_2$ ) |                                              | 189.8<br>(99.5)            | 187.6<br>(96.2)            | 178.4<br>(99.5) | 178.5<br>(97.1) | 170.2<br>(99.6) | 170.4<br>(99.4) | 167.2<br>(99.3) |
| $\chi^2$                   |                                              | 1.05                       | 1.12                       | 1.11            | 1.14            | 1.08            | 1.01            | 1.10            |

Table S5: Recovered excited-state intensity double-exponential decay parameters for pyrene (10  $\mu\text{M}$ ; excitation wavelength at 340 nm using a nano LED source; emission collected at 373 nm) dissolved in the investigated system comprising of 1 wt% water in glycerol solution at varying concentrations of quencher ( $\text{CH}_3\text{NO}_2$ ) and LiCl concentrations at different temperatures in the range 298.15 – 358.15 K. Error associated with decay times is  $\leq \pm 5\%$ . Decay times ( $\tau$ ) are in nanosecond (ns) and  $\alpha$  are in %.

For T = 298.15 K

| [CH <sub>3</sub> NO <sub>2</sub> ]<br>(M) | $m_{\text{LiCl}}$<br>(mol.kg <sup>-1</sup> ) | 0.0                        | 0.5             | 1.0             | 1.5             | 2.0             | 2.5             | 3.0             |
|-------------------------------------------|----------------------------------------------|----------------------------|-----------------|-----------------|-----------------|-----------------|-----------------|-----------------|
|                                           | 0.00                                         | $\tau_1$<br>( $\alpha_1$ ) | 1.7<br>(0.9)    | 1.1<br>(0.5)    | 1.3<br>(0.4)    | 1.6<br>(0.9)    | 1.6<br>(0.4)    | 1.8<br>(1.4)    |
| $\tau_2$<br>( $\alpha_2$ )                |                                              | 241.9<br>(99.1)            | 241.1<br>(99.5) | 239.3<br>(99.5) | 234.3<br>(99.1) | 128.3<br>(99.6) | 226.3<br>(98.6) | 220.6<br>(99.1) |
| $\chi^2$                                  |                                              | 1.08                       | 1.08            | 1.07            | 1.12            | 1.06            | 1.11            | 1.07            |
|                                           |                                              |                            |                 |                 |                 |                 |                 |                 |
| 0.05                                      | $\tau_1$<br>( $\alpha_1$ )                   | 1.9<br>(1.4)               | 1.5<br>(0.8)    | 2.0<br>(0.8)    | 1.9<br>(0.5)    | 2.3<br>(0.6)    | 0.8<br>(2.0)    | 3.0<br>(0.9)    |
|                                           | $\tau_2$<br>( $\alpha_2$ )                   | 164.0<br>(98.6)            | 178.2<br>(99.1) | 178.4<br>(99.2) | 191.8<br>(99.5) | 196.0<br>(99.4) | 192.7<br>(98.0) | 195.7<br>(99.1) |
|                                           | $\chi^2$                                     | 1.15                       | 1.10            | 1.11            | 1.08            | 1.10            | 1.15            | 1.09            |
|                                           |                                              |                            |                 |                 |                 |                 |                 |                 |
| 0.11                                      | $\tau_1$<br>( $\alpha_1$ )                   | 1.9<br>(1.9)               | 2.2<br>(1.2)    | 3.2<br>(1.2)    | 1.7<br>(0.9)    | 2.0<br>(1.0)    | 1.1<br>(2.2)    | 3.3<br>(1.3)    |
|                                           | $\tau_2$<br>( $\alpha_2$ )                   | 138.4<br>(98.1)            | 133.0<br>(98.8) | 149.5<br>(98.8) | 157.2<br>(99.1) | 166.6<br>(99.0) | 171.7<br>(97.8) | 176.4<br>(98.7) |
|                                           | $\chi^2$                                     | 1.13                       | 1.19            | 1.20            | 1.17            | 1.10            | 1.14            | 1.13            |
|                                           |                                              |                            |                 |                 |                 |                 |                 |                 |
| 0.16                                      | $\tau_1$<br>( $\alpha_1$ )                   | 1.8<br>(3.2)               | 1.9<br>(1.9)    | 2.7<br>(1.5)    | 1.9<br>(3.5)    | 1.2<br>(1.4)    | 0.8<br>(2.6)    | 3.2<br>(1.7)    |
|                                           | $\tau_2$<br>( $\alpha_2$ )                   | 89.0<br>(96.8)             | 103.7<br>(98.1) | 123.6<br>(98.5) | 133.4<br>(96.5) | 144.3<br>(98.6) | 148.8<br>(97.4) | 159.4<br>(98.3) |
|                                           | $\chi^2$                                     | 1.17                       | 1.12            | 1.16            | 1.16            | 1.19            | 1.14            | 1.16            |
|                                           |                                              |                            |                 |                 |                 |                 |                 |                 |
| 0.21                                      | $\tau_1$<br>( $\alpha_1$ )                   | 2.1<br>(4.6)               | 2.7<br>(2.8)    | 3.2<br>(2.6)    | 2.0<br>(4.2)    | 1.9<br>(1.8)    | 0.0<br>(100.0)  | 6.4<br>(2.5)    |
|                                           | $\tau_2$<br>( $\alpha_2$ )                   | 67.4<br>(95.4)             | 87.8<br>(97.2)  | 99.5<br>(97.4)  | 114.4<br>(95.8) | 126.4<br>(98.2) | 127.8<br>(0.0)  | 147.6<br>(97.5) |
|                                           | $\chi^2$                                     | 1.14                       | 1.11            | 1.10            | 1.09            | 1.18            | 1.17            | 1.24            |
|                                           |                                              |                            |                 |                 |                 |                 |                 |                 |
| 0.27                                      | $\tau_1$<br>( $\alpha_1$ )                   | 2.1<br>(5.7)               | 1.1<br>(3.4)    | 0.1<br>(8.6)    | 1.3<br>(3.5)    | 1.6<br>(2.1)    | 0.3<br>(6.3)    | 1.5<br>(2.3)    |
|                                           | $\tau_2$<br>( $\alpha_2$ )                   | 54.1<br>(94.3)             | 73.1<br>(96.6)  | 82.0<br>(91.4)  | 100.0<br>(96.5) | 109.9<br>(97.9) | 114.1<br>(93.7) | 131.0<br>(97.7) |
|                                           | $\chi^2$                                     | 1.18                       | 1.13            | 1.05            | 1.08            | 1.13            | 1.12            | 1.21            |
|                                           |                                              |                            |                 |                 |                 |                 |                 |                 |
| 0.32                                      | $\tau_1$<br>( $\alpha_1$ )                   | 1.2<br>(7.2)               | 0.0<br>(99.7)   | 2.1<br>(3.8)    | 3.1<br>(2.8)    | 1.6<br>(2.5)    | 0.1<br>(16.9)   | 1.5<br>(2.9)    |
|                                           | $\tau_2$<br>( $\alpha_2$ )                   | 45.4<br>(92.8)             | 59.9<br>(0.3)   | 73.3<br>(96.2)  | 86.8<br>(97.2)  | 98.6<br>(97.5)  | 98.6<br>(83.1)  | 119.7<br>(97.1) |
|                                           |                                              |                            |                 |                 |                 |                 |                 |                 |
|                                           |                                              |                            |                 |                 |                 |                 |                 |                 |

|             |                            |                |                |                |                |                |               |                 |
|-------------|----------------------------|----------------|----------------|----------------|----------------|----------------|---------------|-----------------|
|             | $\chi^2$                   | 1.18           | 1.12           | 1.08           | 1.11           | 1.13           | 1.10          | 1.19            |
| <b>0.37</b> | $\tau_1$<br>( $\alpha_1$ ) | 0.5<br>(11.6)  | 0.1<br>(11.8)  | 0.1<br>(46.5)  | 1.0<br>(3.1)   | 2.1<br>(3.2)   | 0.0<br>(99.4) | 0.2<br>(6.5)    |
|             | $\tau_2$<br>( $\alpha_2$ ) | 37.4<br>(88.4) | 51.5<br>(88.2) | 60.2<br>(53.5) | 77.4<br>(96.9) | 88.5<br>(96.8) | 91.9<br>(0.6) | 107.4<br>(93.5) |
|             | $\chi^2$                   | 1.15           | 1.08           | 1.09           | 1.13           | 1.10           | 1.07          | 1.09            |

For T = 313.15 K

| $m_{LiCl}$<br>(mol.kg <sup>-1</sup> )<br>[CH <sub>3</sub> NO <sub>2</sub> ]<br>(M) |                            | 0.0             | 0.5                        | 1.0             | 1.5             | 2.0             | 2.5             | 3.0             |
|------------------------------------------------------------------------------------|----------------------------|-----------------|----------------------------|-----------------|-----------------|-----------------|-----------------|-----------------|
|                                                                                    |                            | <b>0.00</b>     | $\tau_1$<br>( $\alpha_1$ ) | 0.8<br>(1.6)    | 0.8<br>(0.2)    | 0.7<br>(0.6)    | 0.5<br>(0.6)    | 0.7<br>(0.5)    |
|                                                                                    | $\tau_2$<br>( $\alpha_2$ ) | 235.7<br>(98.4) | 233.7<br>(99.8)            | 222.6<br>(99.4) | 217.4<br>(99.4) | 213.7<br>(99.5) | 206.9<br>(96.8) | 206.8<br>(99.5) |
|                                                                                    | $\chi^2$                   | 1.08            | 1.10                       | 1.03            | 1.07            | 1.09            | 1.10            | 1.05            |
| <b>0.05</b>                                                                        | $\tau_1$<br>( $\alpha_1$ ) | 1.2<br>(11.5)   | 0.3<br>(2.4)               | 0.9<br>(1.1)    | 3.8<br>(0.5)    | 0.2<br>(0.8)    | 2.0<br>(0.68)   | 0.2<br>(2.00)   |
|                                                                                    | $\tau_2$<br>( $\alpha_2$ ) | 140.4<br>(88.5) | 138.0<br>(97.6)            | 179.0<br>(98.9) | 190.0<br>(99.5) | 184.1<br>(99.2) | 199.8<br>(99.3) | 196.3<br>(98.0) |
|                                                                                    | $\chi^2$                   | 1.10            | 1.16                       | 1.15            | 1.10            | 1.09            | 1.06            | 1.10            |
| <b>0.11</b>                                                                        | $\tau_1$<br>( $\alpha_1$ ) | 5.4<br>(2.7)    | 1.3<br>(1.7)               | 0.6<br>(2.3)    | 0.4<br>(6.4)    | 0.2<br>(2.4)    | 0.2<br>(1.6)    | 0.2<br>(2.3)    |
|                                                                                    | $\tau_2$<br>( $\alpha_2$ ) | 63.0<br>(97.3)  | 71.4<br>(98.3)             | 97.2<br>(97.7)  | 142.6<br>(93.6) | 126.1<br>(97.6) | 154.9<br>(98.4) | 166.6<br>(97.7) |
|                                                                                    | $\chi^2$                   | 1.16            | 1.12                       | 1.20            | 1.09            | 1.90            | 1.16            | 1.09            |
| <b>0.16</b>                                                                        | $\tau_1$<br>( $\alpha_1$ ) | 0.6<br>(4.0)    | 1.7<br>(2.7)               | 0.5<br>(4.0)    | 1.3<br>(1.6)    | 0.0<br>(34.3)   | 0.0<br>(7.1)    | 0.0<br>(100.0)  |
|                                                                                    | $\tau_2$<br>( $\alpha_2$ ) | 45.2<br>(96.0)  | 51.0<br>(97.3)             | 62.3<br>(96.0)  | 89.0<br>(98.4)  | 80.5<br>(65.7)  | 135.8<br>(92.9) | 124.1<br>(0.0)  |
|                                                                                    | $\chi^2$                   | 1.16            | 1.21                       | 1.23            | 1.23            | 1.16            | 1.18            | 1.21            |
| <b>0.21</b>                                                                        | $\tau_1$<br>( $\alpha_1$ ) | 0.5<br>(7.7)    | 0.3<br>(5.0)               | 0.9<br>(5.1)    | 0.6<br>(3.1)    | 0.1<br>(11.7)   | 1.0<br>(2.2)    | 0.2<br>(6.0)    |
|                                                                                    | $\tau_2$<br>( $\alpha_2$ ) | 34.0<br>(92.3)  | 37.3<br>(95.0)             | 51.9<br>(94.9)  | 63.4<br>(96.9)  | 65.3<br>(88.3)  | 112.6<br>(97.8) | 97.9<br>(94.0)  |
|                                                                                    | $\chi^2$                   | 1.15            | 1.39                       | 1.35            | 1.34            | 1.25            | 1.21            | 1.23            |
| <b>0.27</b>                                                                        | $\tau_1$<br>( $\alpha_1$ ) | 2.8<br>(6.7)    | 0.0<br>(96.4)              | 0.3<br>(10.0)   | 0.6<br>(4.0)    | 0.1<br>(11.8)   | 1.4<br>(3.4)    | 0.1<br>(21.1)   |
|                                                                                    | $\tau_2$<br>( $\alpha_2$ ) | 26.8<br>(93.3)  | 29.7<br>(0.6)              | 35.0<br>(90.0)  | 50.1<br>(96.0)  | 60.6<br>(88.2)  | 90.0<br>(96.6)  | 89.2<br>(78.9)  |
|                                                                                    | $\chi^2$                   | 1.29            | 1.30                       | 1.35            | 1.28            | 1.32            | 1.29            | 1.31            |
| <b>0.32</b>                                                                        | $\tau_1$<br>( $\alpha_1$ ) | 0.4<br>(10.5)   | 0.5<br>(8.1)               | 0.6<br>(12.7)   | 0.9<br>(5.0)    | 0.1<br>(41.0)   | 0.4<br>(5.6)    | 0.1<br>(21.7)   |

|             |                            |                |                |                |                |                |                |                |
|-------------|----------------------------|----------------|----------------|----------------|----------------|----------------|----------------|----------------|
|             | $\tau_2$<br>( $\alpha_2$ ) | 22.5<br>(89.5) | 25.3<br>(91.9) | 31.7<br>(87.3) | 43.9<br>(95.0) | 43.9<br>(59.0) | 62.3<br>(94.4) | 78.2<br>(78.3) |
|             | $\chi^2$                   | 1.33           | 1.46           | 1.23           | 1.30           | 1.13           | 1.25           | 1.30           |
| <b>0.37</b> | $\tau_1$<br>( $\alpha_1$ ) | 1.9<br>(8.7)   | 0.0<br>(14.8)  | 0.3<br>(13.7)  | 0.5<br>(7.0)   | 0.0<br>(99.0)  | 0.3<br>(6.4)   | 0.1<br>(26.1)  |
|             | $\tau_2$<br>( $\alpha_2$ ) | 18.3<br>(91.3) | 19.1<br>(85.2) | 28.5<br>(86.3) | 34.4<br>(93.0) | 40.5<br>(1.0)  | 55.4<br>(93.6) | 58.1<br>(73.9) |
|             | $\chi^2$                   | 1.24           | 1.32           | 1.24           | 1.30           | 1.36           | 1.22           | 1.25           |

For T = 328.15 K

| $m_{LiCl}$<br>(mol.kg <sup>-1</sup> )<br>[CH <sub>3</sub> NO <sub>2</sub> ]<br>(M) |                            | 0.0             | 0.5                        | 1.0             | 1.5             | 2.0             | 2.5             | 3.0             |
|------------------------------------------------------------------------------------|----------------------------|-----------------|----------------------------|-----------------|-----------------|-----------------|-----------------|-----------------|
|                                                                                    |                            | <b>0.00</b>     | $\tau_1$<br>( $\alpha_1$ ) | 1.9<br>(0.6)    | 1.9<br>(0.3)    | 1.3<br>(0.4)    | 1.6<br>(0.5)    | 1.0<br>(1.1)    |
|                                                                                    | $\tau_2$<br>( $\alpha_2$ ) | 216.9<br>(99.4) | 210.2<br>(99.7)            | 205.0<br>(99.6) | 202.7<br>(99.5) | 199.1<br>(98.9) | 194.6<br>(99.6) | 192.7<br>(99.3) |
|                                                                                    | $\chi^2$                   | 1.06            | 1.04                       | 1.10            | 1.07            | 1.03            | 1.08            | 1.02            |
| <b>0.05</b>                                                                        | $\tau_1$<br>( $\alpha_1$ ) | 2.6<br>(2.6)    | 0.2<br>(3.0)               | 1.5<br>(1.3)    | 2.4<br>(1.5)    | 1.5<br>(2.1)    | 1.0<br>(1.2)    | 1.2<br>(1.3)    |
|                                                                                    | $\tau_2$<br>( $\alpha_2$ ) | 56.7<br>(97.4)  | 69.9<br>(97.0)             | 72.4<br>(98.7)  | 87.4<br>(98.5)  | 94.3<br>(97.9)  | 113.7<br>(98.8) | 119.7<br>(98.7) |
|                                                                                    | $\chi^2$                   | 1.10            | 1.02                       | 1.06            | 1.12            | 1.05            | 1.03            | 1.06            |
| <b>0.11</b>                                                                        | $\tau_1$<br>( $\alpha_1$ ) | 1.7<br>(4.4)    | 0.8<br>(2.5)               | 1.4<br>(2.8)    | 1.4<br>(2.9)    | 0.2<br>(5.1)    | 2.6<br>(2.1)    | 1.0<br>(2.3)    |
|                                                                                    | $\tau_2$<br>( $\alpha_2$ ) | 29.3<br>(95.6)  | 41.4<br>(97.5)             | 43.6<br>(97.2)  | 51.4<br>(97.1)  | 62.8<br>(94.9)  | 71.3<br>(97.9)  | 87.2<br>(97.7)  |
|                                                                                    | $\chi^2$                   | 1.11            | 1.11                       | 1.09            | 1.11            | 1.09            | 1.06            | 1.03            |
| <b>0.16</b>                                                                        | $\tau_1$<br>( $\alpha_1$ ) | 2.2<br>(7.5)    | 1.2<br>(4.5)               | 1.5<br>(4.0)    | 1.7<br>(3.6)    | 1.7<br>(100.0)  | 3.1<br>(3.2)    | 0.8<br>(3.0)    |
|                                                                                    | $\tau_2$<br>( $\alpha_2$ ) | 20.8<br>(92.5)  | 27.2<br>(95.5)             | 29.6<br>(96.0)  | 36.0<br>(96.4)  | 44.1<br>(0.0)   | 53.6<br>(96.8)  | 66.6<br>(97.0)  |
|                                                                                    | $\chi^2$                   | 1.07            | 1.14                       | 1.16            | 1.01            | 1.06            | 1.08            | 1.10            |
| <b>0.21</b>                                                                        | $\tau_1$<br>( $\alpha_1$ ) | 1.9<br>(9.9)    | 1.4<br>(8.1)               | 1.4<br>(5.3)    | 1.2<br>(5.3)    | 0.0<br>(19.2)   | 1.1<br>(4.3)    | 0.6<br>(4.7)    |
|                                                                                    | $\tau_2$<br>( $\alpha_2$ ) | 15.7<br>(90.1)  | 20.3<br>(91.9)             | 21.9<br>(94.7)  | 27.7<br>(94.7)  | 33.4<br>(80.8)  | 41.5<br>(95.7)  | 51.0<br>(95.3)  |
|                                                                                    | $\chi^2$                   | 1.15            | 1.10                       | 1.20            | 1.15            | 1.11            | 1.09            | 1.13            |
| <b>0.27</b>                                                                        | $\tau_1$<br>( $\alpha_1$ ) | 1.6<br>(10.7)   | 1.0<br>(9.3)               | 1.5<br>(6.7)    | 1.3<br>(6.4)    | 0.0<br>(99.9)   | 2.4<br>(5.3)    | 1.1<br>(5.0)    |
|                                                                                    | $\tau_2$<br>( $\alpha_2$ ) | 12.35<br>(89.3) | 16.08<br>(90.7)            | 18.67<br>(93.3) | 22.18<br>(93.6) | 27.41<br>(0.1)  | 33.95<br>(94.7) | 42.48<br>(95.0) |
|                                                                                    | $\chi^2$                   | 1.11            | 1.11                       | 1.18            | 1.18            | 1.08            | 1.10            | 1.13            |



|             |                            |                |                |                |                |                |                |                |
|-------------|----------------------------|----------------|----------------|----------------|----------------|----------------|----------------|----------------|
| <b>0.32</b> | $\tau_1$<br>( $\alpha_1$ ) | 1.6<br>(13.3)  | 0.6<br>(11.0)  | 0.9<br>(9.2)   | 1.9<br>(8.6)   | 0.2<br>(16.3)  | 1.5<br>(5.8)   | 0.8<br>(5.9)   |
|             | $\tau_2$<br>( $\alpha_2$ ) | 10.0<br>(86.7) | 13.4<br>(89.0) | 14.4<br>(90.8) | 8.1<br>(91.4)  | 22.3<br>(83.7) | 28.1<br>(94.2) | 35.1<br>(94.1) |
|             | $\chi^2$                   | 1.09           | 1.17           | 1.18           | 1.17           | 1.11           | 1.10           | 1.14           |
| <b>0.37</b> | $\tau_1$<br>( $\alpha_1$ ) | 1.5<br>(15.3)  | 0.4<br>(16.3)  | 0.7<br>(11.6)  | 0.4<br>(15.7)  | 0.9<br>(57.5)  | 1.3<br>(6.9)   | 0.7<br>(7.4)   |
|             | $\tau_2$<br>( $\alpha_2$ ) | 8.7<br>(84.7)  | 10.8<br>(83.7) | 12.5<br>(88.4) | 15.3<br>(84.3) | 17.8<br>(42.5) | 24.2<br>(93.1) | 29.9<br>(92.6) |
|             | $\chi^2$                   | 1.07           | 1.17           | 1.17           | 1.15           | 1.06           | 1.15           | 1.16           |

For T = 343.15 K

| $m_{LiCl}$<br>(mol.kg <sup>-1</sup> )<br>[CH <sub>3</sub> NO <sub>2</sub> ]<br>(M) |                            | 0.0            | 0.5                        | 1.0             | 1.5             | 2.0             | 2.5             | 3.0             |
|------------------------------------------------------------------------------------|----------------------------|----------------|----------------------------|-----------------|-----------------|-----------------|-----------------|-----------------|
|                                                                                    |                            | <b>0.00</b>    | $\tau_1$<br>( $\alpha_1$ ) | 1.7<br>(0.5)    | 1.4<br>(0.7)    | 1.6<br>(0.4)    | 1.4<br>(0.6)    | 1.0<br>(0.4)    |
| $\tau_2$<br>( $\alpha_2$ )                                                         | 201.9<br>(99.5)            |                | 195.2<br>(99.3)            | 194.1<br>(99.6) | 188.2<br>(99.4) | 186.9<br>(99.6) | 185.8<br>(99.0) | 180.5<br>(99.4) |
| $\chi^2$                                                                           | 1.04                       |                | 1.07                       | 1.08            | 1.06            | 1.05            | 1.09            | 1.07            |
| <b>0.05</b>                                                                        | $\tau_1$<br>( $\alpha_1$ ) | 2.2<br>(4.4)   | 1.8<br>(4.3)               | 0.5<br>(5.0)    | 1.4<br>(2.3)    | 0.8<br>(2.0)    | 0.1<br>(8.6)    | 0.9<br>(1.9)    |
|                                                                                    | $\tau_2$<br>( $\alpha_2$ ) | 32.1<br>(95.6) | 36.8<br>(95.7)             | 45.6<br>(95.0)  | 54.8<br>(97.7)  | 61.8<br>(98.0)  | 69.0<br>(91.4)  | 84.4<br>(98.1)  |
|                                                                                    | $\chi^2$                   | 1.18           | 1.05                       | 1.07            | 1.03            | 1.04            | 1.09            | 1.04            |
| <b>0.11</b>                                                                        | $\tau_1$<br>( $\alpha_1$ ) | 1.4<br>(6.2)   | 0.9<br>(8.3)               | 1.0<br>(6.4)    | 0.3<br>(6.3)    | 0.2<br>(10.0)   | 0.5<br>(6.5)    | 2.0<br>(3.2)    |
|                                                                                    | $\tau_2$<br>( $\alpha_2$ ) | 19.4<br>(93.8) | 19.6<br>(91.7)             | 22.9<br>(93.6)  | 28.3<br>(93.7)  | 34.6<br>(90.0)  | 42.6<br>(93.5)  | 49.3<br>(96.8)  |
|                                                                                    | $\chi^2$                   | 1.16           | 1.08                       | 1.07            | 1.09            | 1.06            | 1.05            | 1.05            |
| <b>0.16</b>                                                                        | $\tau_1$<br>( $\alpha_1$ ) | 1.6<br>(12.5)  | 0.7<br>(12.3)              | 1.1<br>(10.3)   | 0.7<br>(7.6)    | 0.5<br>(7.1)    | 0.2<br>(14.2)   | 1.5<br>(4.2)    |
|                                                                                    | $\tau_2$<br>( $\alpha_2$ ) | 10.8<br>(87.5) | 12.3<br>(87.7)             | 15.2<br>(89.7)  | 19.4<br>(92.4)  | 25.9<br>(92.9)  | 85.8<br>(85.8)  | 35.2<br>(95.8)  |
|                                                                                    | $\chi^2$                   | 1.12           | 1.11                       | 1.14            | 1.16            | 1.07            | 1.10            | 1.08            |
| <b>0.21</b>                                                                        | $\tau_1$<br>( $\alpha_1$ ) | 0.9<br>(11.5)  | 0.6<br>(16.7)              | 0.9<br>(13.2)   | 0.7<br>(10.7)   | 0.1<br>(21.3)   | 0.4<br>(14.2)   | 0.5<br>(7.9)    |
|                                                                                    | $\tau_2$<br>( $\alpha_2$ ) | 8.1<br>(88.5)  | 9.2<br>(83.3)              | 11.1<br>(86.8)  | 14.9<br>(89.3)  | 19.7<br>(78.7)  | 22.4<br>(85.8)  | 25.7<br>(92.1)  |
|                                                                                    | $\chi^2$                   | 1.07           | 1.13                       | 1.14            | 1.12            | 1.14            | 1.13            | 1.09            |
| <b>0.27</b>                                                                        | $\tau_1$<br>( $\alpha_1$ ) | 0.9<br>(17.0)  | 0.4<br>(22.7)              | 0.2<br>(36.9)   | 0.3<br>(18.2)   | 0.1<br>(29.5)   | 0.1<br>(71.9)   | 0.6<br>(9.0)    |
|                                                                                    | $\tau_2$<br>( $\alpha_2$ ) | 6.2<br>(83.0)  | 7.2<br>(77.3)              | 8.1<br>(63.1)   | 12.3<br>(81.8)  | 15.0<br>(70.5)  | 17.1<br>(71.9)  | 21.3<br>(91.0)  |

|             |                            |               |               |               |                |                |                |                |
|-------------|----------------------------|---------------|---------------|---------------|----------------|----------------|----------------|----------------|
|             | $\chi^2$                   | 1.10          | 1.11          | 1.06          | 1.10           | 1.13           | 1.13           | 1.08           |
| <b>0.32</b> | $\tau_1$<br>( $\alpha_1$ ) | 0.5<br>(20.6) | 0.3<br>(30.3) | 0.1<br>(50.5) | 0.2<br>(28.2)  | 0.0<br>(100.0) | 0.0<br>(99.9)  | 0.1<br>(34.8)  |
|             | $\tau_2$<br>( $\alpha_2$ ) | 5.0<br>(79.4) | 5.7<br>(69.7) | 6.7<br>(49.5) | 9.2<br>(71.8)  | 12.0<br>(0.0)  | 13.6<br>(0.1)  | 19.0<br>(65.2) |
|             | $\chi^2$                   | 1.07          | 1.14          | 1.11          | 1.13           | 1.12           | 1.09           | 1.10           |
| <b>0.37</b> | $\tau_1$<br>( $\alpha_1$ ) | 0.5<br>(20.2) | 0.3<br>(31.8) | 0.0<br>(99.0) | 0.0<br>(100.0) | 0.0<br>(100.0) | 0.0<br>(100.0) | 0.0<br>(100.0) |
|             | $\tau_2$<br>( $\alpha_2$ ) | 4.1<br>(79.8) | 5.0<br>(68.2) | 5.4<br>(0.1)  | 7.8<br>(0.0)   | 10.4<br>(0.0)  | 11.3<br>(0.0)  | 15.4<br>(0.0)  |
|             | $\chi^2$                   | 1.12          | 1.15          | 1.09          | 1.09           | 1.06           | 1.14           | 1.09           |

For T = 358.15 K

| $[\text{CH}_3\text{NO}_2]$<br>(M) | $m_{\text{LiCl}}$<br>(mol.kg <sup>-1</sup> ) | 0.0             | 0.5                        | 1.0             | 1.5             | 2.0             | 2.5             | 3.0             |
|-----------------------------------|----------------------------------------------|-----------------|----------------------------|-----------------|-----------------|-----------------|-----------------|-----------------|
|                                   |                                              | <b>0.00</b>     | $\tau_1$<br>( $\alpha_1$ ) | 2.4<br>(0.5)    | 83.1<br>(3.8)   | 1.6<br>(0.5)    | 80.6<br>(3.0)   | 0.8<br>(0.4)    |
|                                   | $\tau_2$<br>( $\alpha_2$ )                   | 189.8<br>(99.5) | 187.6<br>(96.2)            | 178.4<br>(99.5) | 178.5<br>(97.0) | 170.2<br>(99.6) | 170.4<br>(99.4) | 167.2<br>(99.3) |
|                                   | $\chi^2$                                     | 1.05            | 1.12                       | 1.11            | 1.14            | 1.08            | 1.01            | 1.10            |
| <b>0.05</b>                       | $\tau_1$<br>( $\alpha_1$ )                   | 2.5<br>(4.5)    | 1.9<br>(4.1)               | 1.5<br>(3.7)    | 1.4<br>(2.5)    | 0.5<br>(3.8)    | 0.8<br>(3.0)    | 0.6<br>(3.8)    |
|                                   | $\tau_2$<br>( $\alpha_2$ )                   | 23.4<br>(95.5)  | 24.4<br>(95.9)             | 26.7<br>(96.3)  | 31.9<br>(97.5)  | 32.3<br>(96.2)  | 41.7<br>(97.0)  | 48.6<br>(96.2)  |
|                                   | $\chi^2$                                     | 1.16            | 1.11                       | 1.11            | 1.30            | 1.05            | 1.01            | 1.06            |
| <b>0.11</b>                       | $\tau_1$<br>( $\alpha_1$ )                   | 1.4<br>(9.5)    | 0.8<br>(8.9)               | 1.0<br>(7.7)    | 1.3<br>(5.6)    | 0.9<br>(8.0)    | 0.4<br>(7.1)    | 0.5<br>(6.9)    |
|                                   | $\tau_2$<br>( $\alpha_2$ )                   | 9.6<br>(90.5)   | 11.4<br>(91.1)             | 13.1<br>(92.3)  | 16.2<br>(94.4)  | 18.4<br>(92.0)  | 23.6<br>(92.9)  | 28.0<br>(93.1)  |
|                                   | $\chi^2$                                     | 1.19            | 1.12                       | 1.10            | 1.08            | 1.12            | 1.04            | 1.04            |
| <b>0.16</b>                       | $\tau_1$<br>( $\alpha_1$ )                   | 0.7<br>(11.4)   | 1.1<br>(13.1)              | 0.8<br>(10.8)   | 1.2<br>(9.2)    | 0.2<br>(15.8)   | 0.1<br>(23.5)   | 0.1<br>(40.1)   |
|                                   | $\tau_2$<br>( $\alpha_2$ )                   | 5.9<br>(88.6)   | 7.4<br>(86.9)              | 8.3<br>(89.2)   | 10.8<br>(90.8)  | 11.3<br>(84.2)  | 15.4<br>(76.5)  | 17.9<br>(59.9)  |
|                                   | $\chi^2$                                     | 1.15            | 1.12                       | 1.10            | 1.05            | 1.03            | 1.03            | 1.03            |
| <b>0.21</b>                       | $\tau_1$<br>( $\alpha_1$ )                   | 1.3<br>(23.8)   | 0.6<br>(16.6)              | 0.4<br>(16.1)   | 1.2<br>(16.1)   | 0.2<br>(23.0)   | 0.1<br>(37.1)   | 0.5<br>(15.7)   |
|                                   | $\tau_2$<br>( $\alpha_2$ )                   | 4.9<br>(76.2)   | 5.2<br>(83.4)              | 6.2<br>(83.9)   | 8.1<br>(83.9)   | 8.3<br>(77.0)   | 13.0<br>(62.9)  | 14.5<br>(84.3)  |
|                                   | $\chi^2$                                     | 1.08            | 1.15                       | 1.13            | 1.08            | 1.13            | 1.00            | 1.06            |
| <b>0.27</b>                       | $\tau_1$<br>( $\alpha_1$ )                   | 1.0<br>(19.2)   | 0.4<br>(21.9)              | 0.1<br>(100.0)  | 0.4<br>(15.1)   | 0.3<br>(22.3)   | 0.1<br>(40.9)   | 0.1<br>(41.4)   |

|             |                            |                |                |                |                |                |                |                |
|-------------|----------------------------|----------------|----------------|----------------|----------------|----------------|----------------|----------------|
|             | $\tau_2$<br>( $\alpha_2$ ) | 3.4<br>(80.8)  | 4.0<br>(78.1)  | 4.5<br>(0.0)   | 6.2<br>(84.9)  | 6.8<br>(77.7)  | 9.8<br>(59.1)  | 11.8<br>(58.6) |
|             | $\chi^2$                   | 1.15           | 1.12           | 1.11           | 1.09           | 1.10           | 1.06           | 1.05           |
| <b>0.32</b> | $\tau_1$<br>( $\alpha_1$ ) | 0.9<br>(32.9)  | 0.2<br>(32.5)  | 0.2<br>(28.9)  | 0.8<br>(23.0)  | 0.2<br>(42.0)  | 0.2<br>(38.6)  | 0.0<br>(100.0) |
|             | $\tau_2$<br>( $\alpha_2$ ) | 3.13<br>(67.1) | 3.39<br>(67.5) | 3.81<br>(71.1) | 5.42<br>(77.0) | 5.53<br>(58.0) | 7.70<br>(61.4) | 9.69<br>(0.0)  |
|             | $\chi^2$                   | 1.07           | 1.13           | 1.16           | 1.11           | 1.08           | 1.08           | 1.06           |
| <b>0.37</b> | $\tau_1$<br>( $\alpha_1$ ) | 0.4<br>(29.3)  | 0.2<br>(39.5)  | 0.2<br>(40.3)  | 0.4<br>(29.2)  | 0.1<br>(100.0) | 0.1<br>(100.0) | 0.1<br>(100.0) |
|             | $\tau_2$<br>( $\alpha_2$ ) | 2.3<br>(70.4)  | 2.9<br>(60.5)  | 3.3<br>(59.7)  | 4.3<br>(70.8)  | 4.5<br>(0.0)   | 6.1<br>(0.0)   | 8.4<br>(0.0)   |
|             | $\chi^2$                   | 1.07           | 1.15           | 1.16           | 1.07           | 1.07           | 1.07           | 1.03           |

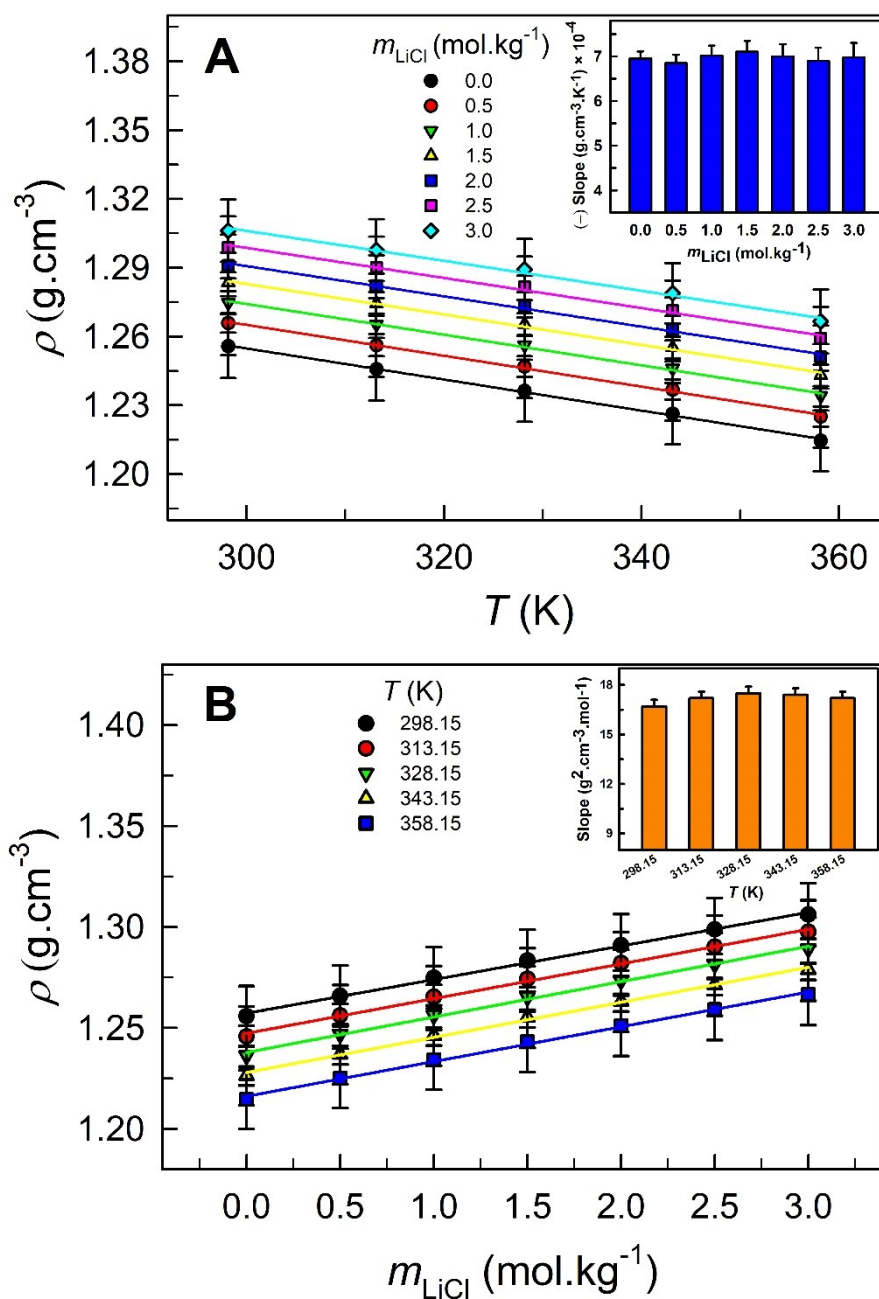

Fig. S1: Plots of density ( $\rho$ ) vs temperature (panel A) at different concentrations of LiCl and density ( $\rho$ ) vs  $m_{\text{LiCl}}$  (panel B) at different temperatures in the range 298.15 – 358.15 K for 1 wt% water in glycerol system. Error associated with  $\rho$  is  $<0.2\%$ .
